# Supplementary material for: The electron transfer rate of large TPA based compounds: a joint theoretical and electrochemical approach
Source: Royal Society of Chemistry journal article supplement (doi:10.1039/b509149g), 2005-01-01
Supplement: b509149g.pdf [file b509149g.pdf]

# Electronic Supplementary Information

## The electron transfer rate of large TPA based compounds: a joint theoretical and electrochemical approach

Alessandra Degli Esposti<sup>1</sup>, Valeria Fattori, Cristiana Sabatini, Giuseppe Casalbore-Miceli, Giancarlo Marconi

*Istituto per la Sintesi Organica e la Fotoreattività (ISOF), CNR,  
via P. Gobetti, 101, I-40129 Bologna (Italy)*

**Fig.S1:** HOMO electron density contouring drawn using MOLDEN:  
G. Schaftenaar and J. H. Noordik, *J. Comput.-Aided Mol. Design* **14**, 123 (2000).

**Table S1-S5:** Significant bond lengths, planar and dihedral angles of NBDB, TAPC, MT-DATA, MPTAB, and MDTAB calculated using:

Gaussian 03, Revision B.05,  
M. J. Frisch, G. W. Trucks, H. B. Schlegel, G. E. Scuseria,  
M. A. Robb, J. R. Cheeseman, J. A. Montgomery, Jr., T. Vreven,  
K. N. Kudin, J. C. Burant, J. M. Millam, S. S. Iyengar, J. Tomasi,  
V. Barone, B. Mennucci, M. Cossi, G. Scalmani, N. Rega,  
G. A. Petersson, H. Nakatsuji, M. Hada, M. Ehara, K. Toyota,  
R. Fukuda, J. Hasegawa, M. Ishida, T. Nakajima, Y. Honda, O. Kitao,  
H. Nakai, M. Klene, X. Li, J. E. Knox, H. P. Hratchian, J. B. Cross,  
C. Adamo, J. Jaramillo, R. Gomperts, R. E. Stratmann, O. Yazyev,  
A. J. Austin, R. Cammi, C. Pomelli, J. W. Ochterski, P. Y. Ayala,  
K. Morokuma, G. A. Voth, P. Salvador, J. J. Dannenberg,  
V. G. Zakrzewski, S. Dapprich, A. D. Daniels, M. C. Strain,  
O. Farkas, D. K. Malick, A. D. Rabuck, K. Raghavachari,  
J. B. Foresman, J. V. Ortiz, Q. Cui, A. G. Baboul, S. Clifford,  
J. Cioslowski, B. B. Stefanov, G. Liu, A. Liashenko, P. Piskorz,  
I. Komaromi, R. L. Martin, D. J. Fox, T. Keith, M. A. Al-Laham,  
C. Y. Peng, A. Nanayakkara, M. Challacombe, P. M. W. Gill,  
B. Johnson, W. Chen, M. W. Wong, C. Gonzalez, and J. A. Pople,  
Gaussian, Inc., Pittsburgh PA, 2003.

---

<sup>1</sup>Corresponding author *e-mail*: [alessandra.degliesposti@isof.cnr.it](mailto:alessandra.degliesposti@isof.cnr.it)

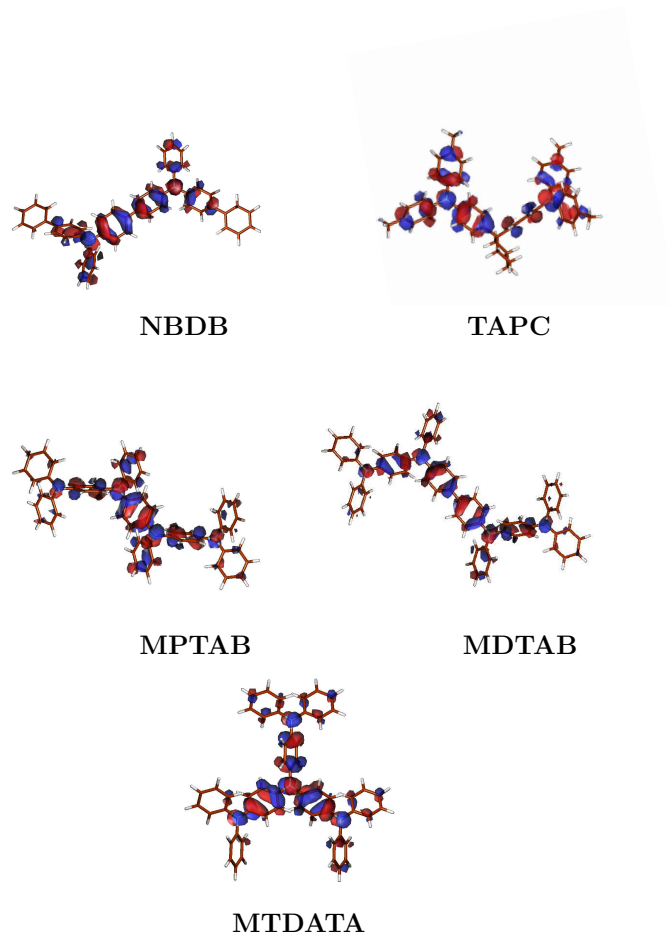

Figure S1: HOMO electron density contouring of NBDB, TAPC, MPTAB, MDTAB, and MTDATA.

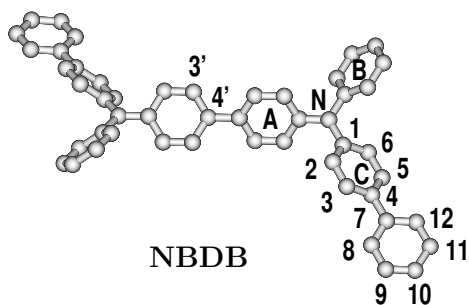

Table S1: NBDB: bond length ( $\text{\AA}$ ), planar and dihedral angles (*degrees*) of the neutral (M) and cationic ( $M^+$ ) species referred to the labeling in the figure.

| <i>bond</i>    | <i>planar angle</i> |       | <i>dihedral angle</i> |       |       |                             |       |       |
|----------------|---------------------|-------|-----------------------|-------|-------|-----------------------------|-------|-------|
|                | M                   | $M^+$ | M                     | $M^+$ | M     | $M^+$                       | M     | $M^+$ |
| $NC_1^A$       | 1.420               | 1.392 | $C_6^A C_1^A C_2^A$   | 118.4 | 118.0 | $C_1^A C_1^B C_1^C N$       | -0.3  | 0.1   |
| $C_1^A C_2^A$  | 1.404               | 1.416 | $C_1^A C_2^A C_3^A$   | 120.6 | 120.6 | $C_2^A C_1^A N C_1^B$       | -41.3 | -28.1 |
| $C_2^A C_3^A$  | 1.390               | 1.380 | $C_2^A C_3^A C_4^A$   | 121.6 | 122.0 | $C_2^B C_1^B N C_1^C$       | -42.5 | -47.9 |
| $C_3^A C_4^A$  | 1.406               | 1.417 | $C_3^A C_4^A C_5^A$   | 117.2 | 116.6 | $C_3^A C_4^A C_{4'} C_{3'}$ | 34.8  | 22.1  |
| $C_4^A C_{4'}$ | 1.481               | 1.459 |                       |       |       | $C_3^C C_4^C C_7 C_8$       | 36.6  | 34.6  |
| $NC_1^B$       | 1.423               | 1.431 | $C_6^B C_1^B C_2^B$   | 119.0 | 120.1 |                             |       |       |
| $C_1^B C_2^B$  | 1.404               | 1.402 | $C_1^B C_2^B C_3^B$   | 120.3 | 119.7 |                             |       |       |
| $C_2^B C_3^B$  | 1.394               | 1.393 | $C_2^B C_3^B C_4^B$   | 120.6 | 120.4 |                             |       |       |
| $C_3^B C_4^B$  | 1.397               | 1.397 | $C_3^B C_4^B C_5^B$   | 119.3 | 119.8 |                             |       |       |
| $NC_1^C$       | 1.419               | 1.424 | $C_6^C C_1^C C_2^C$   | 118.3 | 119.0 |                             |       |       |
| $C_1^C C_2^C$  | 1.405               | 1.405 | $C_1^C C_2^C C_3^C$   | 120.6 | 120.1 |                             |       |       |
| $C_2^C C_3^C$  | 1.390               | 1.389 | $C_2^C C_3^C C_4^C$   | 121.6 | 121.5 |                             |       |       |
| $C_3^C C_4^C$  | 1.406               | 1.408 | $C_3^C C_4^C C_5^C$   | 117.2 | 117.5 |                             |       |       |
| $C_4^C C_7$    | 1.483               | 1.480 | $C_{12} C_7 C_8$      | 118.0 | 118.3 |                             |       |       |
| $C_7 C_8$      | 1.406               | 1.406 | $C_7 C_8 C_9$         | 121.0 | 120.8 |                             |       |       |
| $C_8 C_9$      | 1.394               | 1.393 | $C_8 C_9 C_{10}$      | 120.3 | 120.2 |                             |       |       |
| $C_9 C_{10}$   | 1.396               | 1.396 | $C_8 C_9 C_{11}$      | 119.4 | 119.6 |                             |       |       |

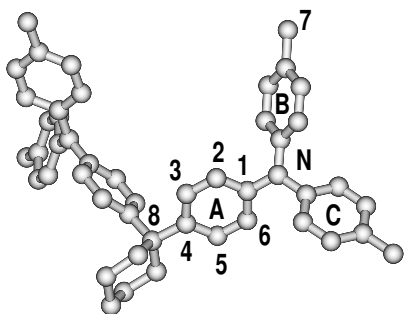

TAPC

Table S2: TAPC: bond length ( $\text{\AA}$ ), planar and dihedral angles (*degrees*) of the neutral (**M**) and cationic (**M<sup>+</sup>**) species referred to the labeling in the figure.

| <i>bond</i>           | <i>planar angle</i> |                      | <i>dihedral angle</i>           |                      |       |                       |      |      |
|-----------------------|---------------------|----------------------|---------------------------------|----------------------|-------|-----------------------|------|------|
|                       | <b>M</b>            | <b>M<sup>+</sup></b> | <b>M</b>                        | <b>M<sup>+</sup></b> |       |                       |      |      |
| $NC_1^A$              | 1.420               | 1.406                | $C_6^A C_1^A C_2^A$             | 118.0                | 118.3 | $C_1^A C_1^B C_1^C N$ | 0.0  | 0.1  |
| $C_1^A C_2^A$         | 1.400               | 1.411                | $C_1^A C_2^A C_3^A$             | 120.7                | 120.3 | $C_2^A C_1^A NC_1^B$  | 41.4 | 32.4 |
| $C_2^A C_3^A$         | 1.395               | 1.384                | $C_2^A C_3^A C_4^A$             | 122.1                | 122.1 | $C_6^A C_1^A NC_1^C$  | 41.9 | 32.6 |
| $C_3^A C_4^A$         | 1.402               | 1.411                | $C_3^A C_4^A C_5^A$             | 116.4                | 116.9 | $C_2^B C_1^B NC_1^C$  | 41.8 | 41.7 |
| $C_4^A C_5^A$         | 1.406               | 1.406                | $C_4^A C_5^A C_6^A$             | 122.2                | 121.8 |                       |      |      |
| $C_5^A C_6^A$         | 1.390               | 1.390                | $C_5^A C_6^A C_1^A$             | 120.6                | 120.5 |                       |      |      |
| $C_6^A C_1^A$         | 1.404               | 1.408                |                                 |                      |       |                       |      |      |
| $C_4^A C_8$           | 1.546               | 1.542                |                                 |                      |       |                       |      |      |
| $NC_1^{B,C}$          | 1.422               | 1.422                | $C_6^{B,C} C_1^{B,C} C_2^{B,C}$ | 118.4                | 119.2 |                       |      |      |
| $C_1^{B,C} C_2^{B,C}$ | 1.404               | 1.405                | $C_1^{B,C} C_2^{B,C} C_3^{B,C}$ | 120.5                | 120.0 |                       |      |      |
| $C_2^{B,C} C_3^{B,C}$ | 1.393               | 1.390                | $C_2^{B,C} C_3^{B,C} C_4^{B,C}$ | 121.6                | 121.5 |                       |      |      |
| $C_3^{B,C} C_4^{B,C}$ | 1.401               | 1.404                | $C_3^{B,C} C_4^{B,C} C_5^{B,C}$ | 117.5                | 117.8 |                       |      |      |
| $C_4^{B,C} C_7^{B,C}$ | 1.511               | 1.508                |                                 |                      |       |                       |      |      |

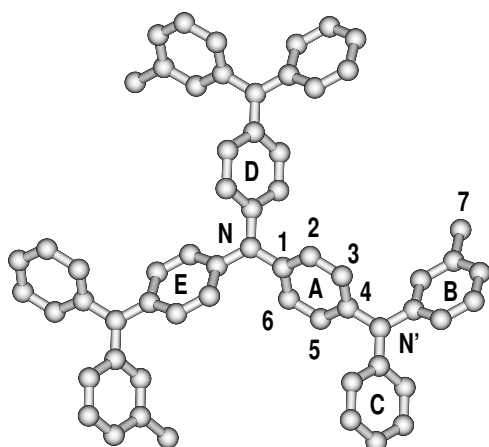

MTDATA

Table S3: MTDATA: bond length ( $\text{\AA}$ ), planar and dihedral angles (*degrees*) of the neutral (**M**) and cationic (**M<sup>+</sup>**) species referred to the labeling in the figure.

| <i>bond</i>           | <i>planar angle</i> |                      | <i>dihedral angle</i>           |                      |       |                        |       |       |
|-----------------------|---------------------|----------------------|---------------------------------|----------------------|-------|------------------------|-------|-------|
|                       | <b>M</b>            | <b>M<sup>+</sup></b> | <b>M</b>                        | <b>M<sup>+</sup></b> |       |                        |       |       |
| $NC_1^A$              | 1.421               | 1.410                | $C_6^A C_1^A C_2^A$             | 118.3                | 118.4 | $C_1^A C_1^D C_1^E N$  | -0.1  | 0.0   |
| $C_1^A C_2^A$         | 1.404               | 1.409                | $C_1^A C_2^A C_3^A$             | 120.8                | 120.9 | $C_1^A C_1^B C_1^C N'$ | 0.2   | 0.0   |
| $C_2^A C_3^A$         | 1.390               | 1.382                | $C_2^A C_3^A C_4^A$             | 120.9                | 121.0 | $C_2^A C_1^A N C_1^D$  | 41.9  | 39.1  |
| $C_3^A C_4^A$         | 1.404               | 1.416                | $C_3^A C_4^A C_5^A$             | 118.3                | 117.8 | $C_3^A C_4^A N' C_1^B$ | -43.9 | -25.0 |
| $C_4^A N'$            | 1.422               | 1.392                |                                 |                      |       | $C_3^B C_1^B N' C_1^C$ | -41.6 | -50.4 |
|                       |                     |                      |                                 |                      |       | $C_3^C C_1^C N' C_1^A$ | -39.4 | -51.1 |
| $C_4^{B,C} N'$        | 1.421               | 1.433                | $C_6^{B,C} C_1^{B,C} C_2^{B,C}$ | 119.2                | 119.9 |                        |       |       |
| $C_1^{B,C} C_2^{B,C}$ | 1.405               | 1.402                | $C_1^{B,C} C_2^{B,C} C_3^{B,C}$ | 120.6                | 120.3 |                        |       |       |
| $C_2^{B,C} C_3^{B,C}$ | 1.393               | 1.394                | $C_2^{B,C} C_3^{B,C} C_4^{B,C}$ | 120.3                | 119.9 |                        |       |       |
| $C_3^{B,C} C_4^{B,C}$ | 1.396               | 1.397                | $C_3^{B,C} C_4^{B,C} C_5^{B,C}$ | 118.9                | 119.8 |                        |       |       |
| $C_5^B C_7^B$         | 1.512               | 1.511                |                                 |                      |       |                        |       |       |

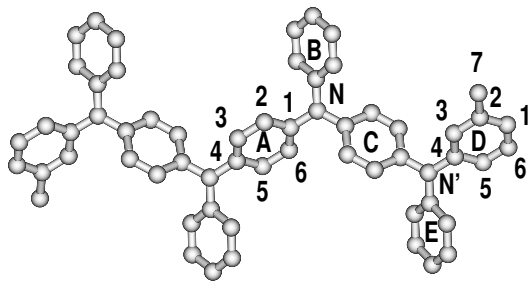

MPTAB

Table S4: MPTAB: bond length (Å), planar and dihedral angles (*degrees*) of the neutral (M) and cationic (M<sup>+</sup>) species referred to the labeling in the figure.

| <i>bond</i>   | <i>planar angle</i> |                | <i>dihedral angle</i> |                |       |                        |       |       |
|---------------|---------------------|----------------|-----------------------|----------------|-------|------------------------|-------|-------|
|               | M                   | M <sup>+</sup> | M                     | M <sup>+</sup> |       |                        |       |       |
| $NC_1^A$      | 1.421               | 1.400          | $C_6^A C_1^A C_2^A$   | 118.3          | 118.1 | $C_1^A C_1^B C_1^C N$  | 0.2   | -0.3  |
| $C_1^A C_2^A$ | 1.405               | 1.414          | $C_1^A C_2^A C_3^A$   | 120.8          | 121.0 | $C_1^C C_1^D C_1^E N'$ | 0.3   | -0.8  |
| $C_2^A C_3^A$ | 1.391               | 1.381          | $C_2^A C_3^A C_4^A$   | 120.8          | 121.0 | $C_2^A C_1^A N C_1^B$  | 43.3  | 31.9  |
| $C_3^A C_4^A$ | 1.404               | 1.414          | $C_3^A C_4^A C_5^A$   | 118.3          | 118.1 | $C_2^B C_1^B N C_1^C$  | 39.7  | 48.7  |
|               |                     |                |                       |                |       | $C_2^C C_1^C N C_1^A$  | 42.4  | 39.8  |
| $C_1^B N$     | 1.420               | 1.432          | $C_6^B C_1^B C_2^B$   | 118.8          | 119.8 | $C_3^C C_4^C N' C_1^E$ | -44.4 | -26.3 |
| $C_1^B C_2^B$ | 1.405               | 1.402          | $C_1^B C_2^B C_3^B$   | 120.4          | 119.8 | $C_3^D C_4^D N' C_1^C$ | -41.1 | -49.0 |
| $C_2^B C_3^B$ | 1.393               | 1.393          | $C_2^B C_3^B C_4^B$   | 120.7          | 120.4 | $C_3^E C_4^E N' C_1^D$ | -39.4 | -48.1 |
| $C_3^B C_4^B$ | 1.396               | 1.397          | $C_3^B C_4^B C_5^B$   | 119.1          | 119.8 |                        |       |       |
|               |                     |                |                       |                |       |                        |       |       |
| $C_1^C N$     | 1.422               | 1.415          | $C_6^C C_1^C C_2^C$   | 118.3          | 118.4 |                        |       |       |
| $C_1^C C_2^C$ | 1.404               | 1.408          | $C_1^C C_2^C C_3^C$   | 120.8          | 120.9 |                        |       |       |
| $C_2^C C_3^C$ | 1.391               | 1.384          | $C_2^C C_3^C C_4^C$   | 120.8          | 121.0 |                        |       |       |
| $C_3^C C_4^C$ | 1.404               | 1.414          | $C_3^C C_4^C C_5^C$   | 118.3          | 117.9 |                        |       |       |
| $C_4^C N'$    | 1.421               | 1.396          |                       |                |       |                        |       |       |
|               |                     |                |                       |                |       |                        |       |       |
| $C_4^D N'$    | 1.422               | 1.431          | $C_6^D C_1^D C_2^D$   | 120.2          | 120.7 |                        |       |       |
| $C_1^D C_2^D$ | 1.400               | 1.397          | $C_1^D C_2^D C_3^D$   | 118.8          | 118.4 |                        |       |       |
| $C_2^D C_3^D$ | 1.400               | 1.394          | $C_2^D C_3^D C_4^D$   | 121.4          | 121.0 |                        |       |       |
| $C_3^D C_4^D$ | 1.402               | 1.402          | $C_3^D C_4^D C_5^D$   | 119.0          | 119.9 |                        |       |       |
| $C_2^D C_7^D$ | 1.512               | 1.511          |                       |                |       |                        |       |       |
|               |                     |                |                       |                |       |                        |       |       |
| $C_4^E N'$    | 1.420               | 1.430          | $C_6^E C_1^E C_2^E$   | 119.1          | 119.6 |                        |       |       |
| $C_1^E C_2^E$ | 1.396               | 1.397          | $C_1^E C_2^E C_3^E$   | 120.6          | 120.4 |                        |       |       |
| $C_2^E C_3^E$ | 1.393               | 1.394          | $C_2^E C_3^E C_4^E$   | 120.3          | 120.0 |                        |       |       |
| $C_3^E C_4^E$ | 1.405               | 1.402          | $C_3^E C_4^E C_5^E$   | 118.9          | 119.7 |                        |       |       |

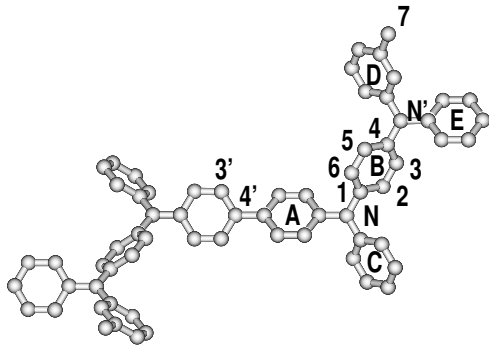

MDTAB

Table S5: MDTAB: bond length ( $\text{\AA}$ ), planar and dihedral angles (*degrees*) of the neutral (M) and cationic ( $M^+$ ) species referred to the labeling in the figure.

| bond           | planar angle |       | dihedral angle      |       |       |                             |       |       |
|----------------|--------------|-------|---------------------|-------|-------|-----------------------------|-------|-------|
|                | M            | $M^+$ | M                   | $M^+$ |       |                             |       |       |
| $NC_1^A$       | 1.419        | 1.406 | $C_6^A C_1^A C_2^A$ | 118.3 | 118.2 | $C_1^A C_1^B C_1^C N$       | -0.2  | 0.0   |
| $C_1^A C_2^A$  | 1.405        | 1.411 | $C_1^A C_2^A C_3^A$ | 120.6 | 120.6 | $C_1^B C_1^D C_1^E N'$      | 0.6   | 0.0   |
| $C_2^A C_3^A$  | 1.390        | 1.385 | $C_2^A C_3^A C_4^A$ | 121.7 | 121.8 | $C_2^A C_1^A N C_1^B$       | 39.6  | 33.4  |
| $C_3^A C_4^A$  | 1.406        | 1.412 | $C_3^A C_4^A C_5^A$ | 117.1 | 116.9 | $C_2^B C_1^B N C_1^C$       | 43.2  | 38.0  |
| $C_4^A C_{4'}$ | 1.480        | 1.468 |                     |       |       | $C_2^C C_1^C N C_1^A$       | 41.6  | 49.2  |
| $C_1^B N$      | 1.422        | 1.413 | $C_6^B C_1^B C_2^B$ | 118.4 | 118.3 | $C_3^B C_4^B N' C_1^E$      | -43.7 | -29.2 |
| $C_1^B C_2^B$  | 1.404        | 1.409 | $C_1^B C_2^B C_3^B$ | 120.8 | 120.9 | $C_3^D C_4^D N' C_1^B$      | -42.1 | -47.5 |
| $C_2^B C_3^B$  | 1.390        | 1.384 | $C_2^B C_3^B C_4^B$ | 120.8 | 120.9 | $C_3^E C_4^E N' C_1^D$      | -40.5 | -47.0 |
| $C_3^B C_4^B$  | 1.404        | 1.413 | $C_3^B C_4^B C_5^B$ | 118.4 | 118.0 | $C_3^A C_4^A C_{3'} C_{4'}$ | -33.9 | -29.4 |
| $C_4^B N'$     | 1.422        | 1.399 |                     |       |       |                             |       |       |
| $C_1^C N$      | 1.421        | 1.430 | $C_6^C C_1^C C_2^C$ | 119.2 | 119.8 |                             |       |       |
| $C_1^C C_2^C$  | 1.405        | 1.402 | $C_1^C C_2^C C_3^C$ | 120.6 | 119.8 |                             |       |       |
| $C_2^C C_3^C$  | 1.393        | 1.393 | $C_2^C C_3^C C_4^C$ | 120.3 | 120.4 |                             |       |       |
| $C_3^C C_4^C$  | 1.397        | 1.397 | $C_3^C C_4^C C_5^C$ | 118.9 | 119.7 |                             |       |       |
| $C_4^D N'$     | 1.422        | 1.428 | $C_6^D C_1^D C_2^D$ | 120.3 | 120.7 |                             |       |       |
| $C_1^D C_2^D$  | 1.397        | 1.397 | $C_1^D C_2^D C_3^D$ | 118.7 | 118.5 |                             |       |       |
| $C_2^D C_3^D$  | 1.391        | 1.393 | $C_2^D C_3^D C_4^D$ | 121.3 | 121.0 |                             |       |       |
| $C_3^D C_4^D$  | 1.405        | 1.397 | $C_3^D C_4^D C_5^D$ | 119.0 | 119.8 |                             |       |       |
| $C_6^D C_7^D$  | 1.512        | 1.511 |                     |       |       |                             |       |       |
| $C_4^E N'$     | 1.420        | 1.429 | $C_6^E C_1^E C_2^E$ | 119.1 | 119.6 |                             |       |       |
| $C_1^E C_2^E$  | 1.396        | 1.397 | $C_1^E C_2^E C_3^E$ | 120.6 | 120.4 |                             |       |       |
| $C_2^E C_3^E$  | 1.393        | 1.393 | $C_2^E C_3^E C_4^E$ | 120.3 | 119.9 |                             |       |       |
| $C_3^E C_4^E$  | 1.405        | 1.402 | $C_3^E C_4^E C_5^E$ | 118.8 | 119.6 |                             |       |       |
